# Supplementary material for: Ubiquitin ligase RNF20/40 facilitates spindle assembly and promotes breast carcinogenesis through stabilizing motor protein Eg5
Source: PubMed Central journal article supplement (PMC5007379; doi:10.1038/ncomms12648), 2016-08-25
Supplement: ncomms12648-s1.pdf [file ncomms12648-s1.pdf]

## Supplementary Figure 1

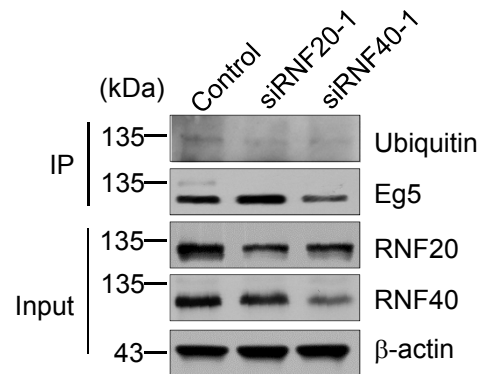

**Supplementary Figure 1. The monoubiquitination of Eg5 is decreased upon RNF20/40 depletion.** MCF-7 cells transfected with control or RNF20/40 siRNAs were treated with MG132, and then cell lysates were subjected to immunoprecipitation with anti-Eg5 followed by immunoblotting with anti-ubiquitin and anti-Eg5.

## Supplementary Figure 2

**Figure 1b**  
HeLa

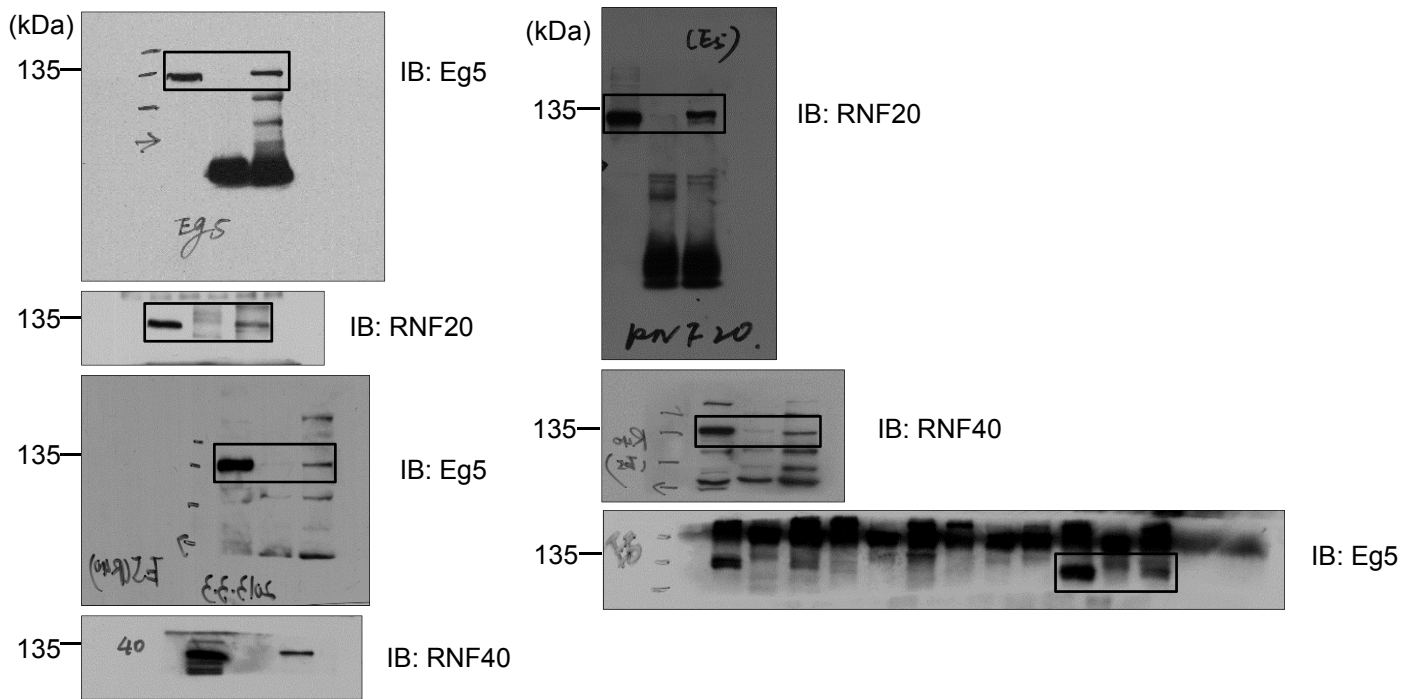

**Supplementary Figure 2. Uncropped scans of blots.** Uncropped scans of Figure 1b (IPs in HeLa cells).

### Supplementary Figure 3

**Figure 1b**

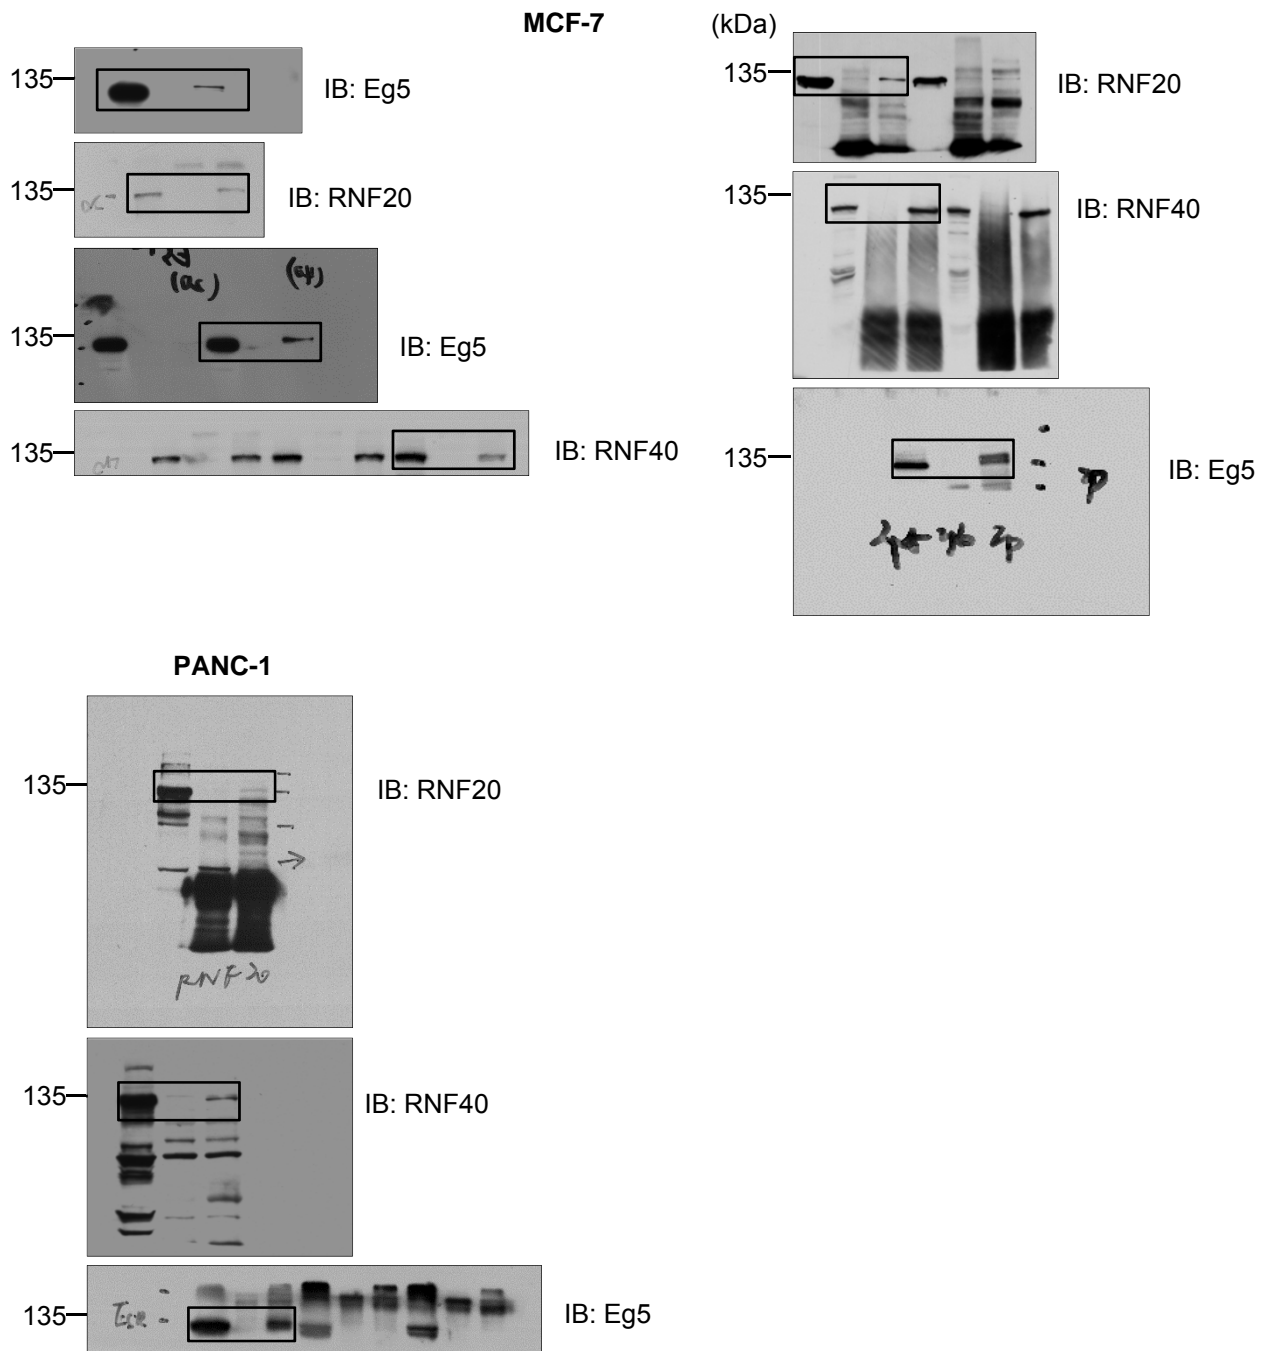

**Supplementary Figure 3. Uncropped scans of blots.** Uncropped scans of Figure 1b (IPs in MCF-7 and PANC-1 cells).

## Supplementary Figure 4

### Figure 1c

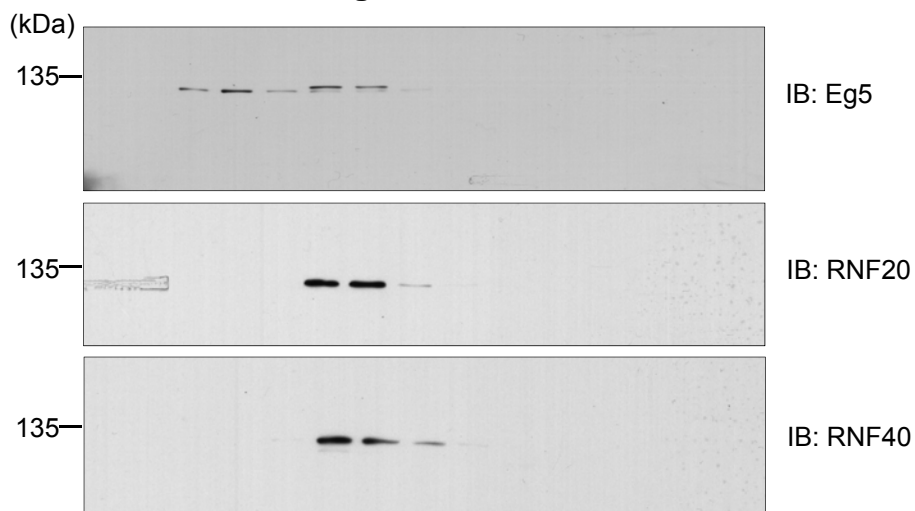

### Figure 1d

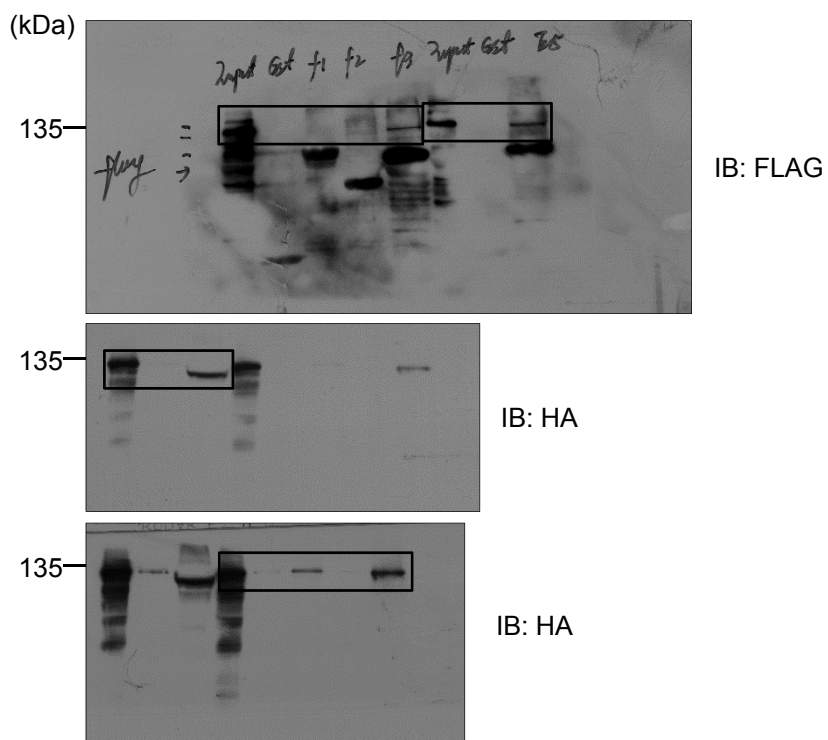

**Supplementary Figure 4. Uncropped scans of blots.** Uncropped scans of Figure 1c and Figure 1d.

## Supplementary Figure 5

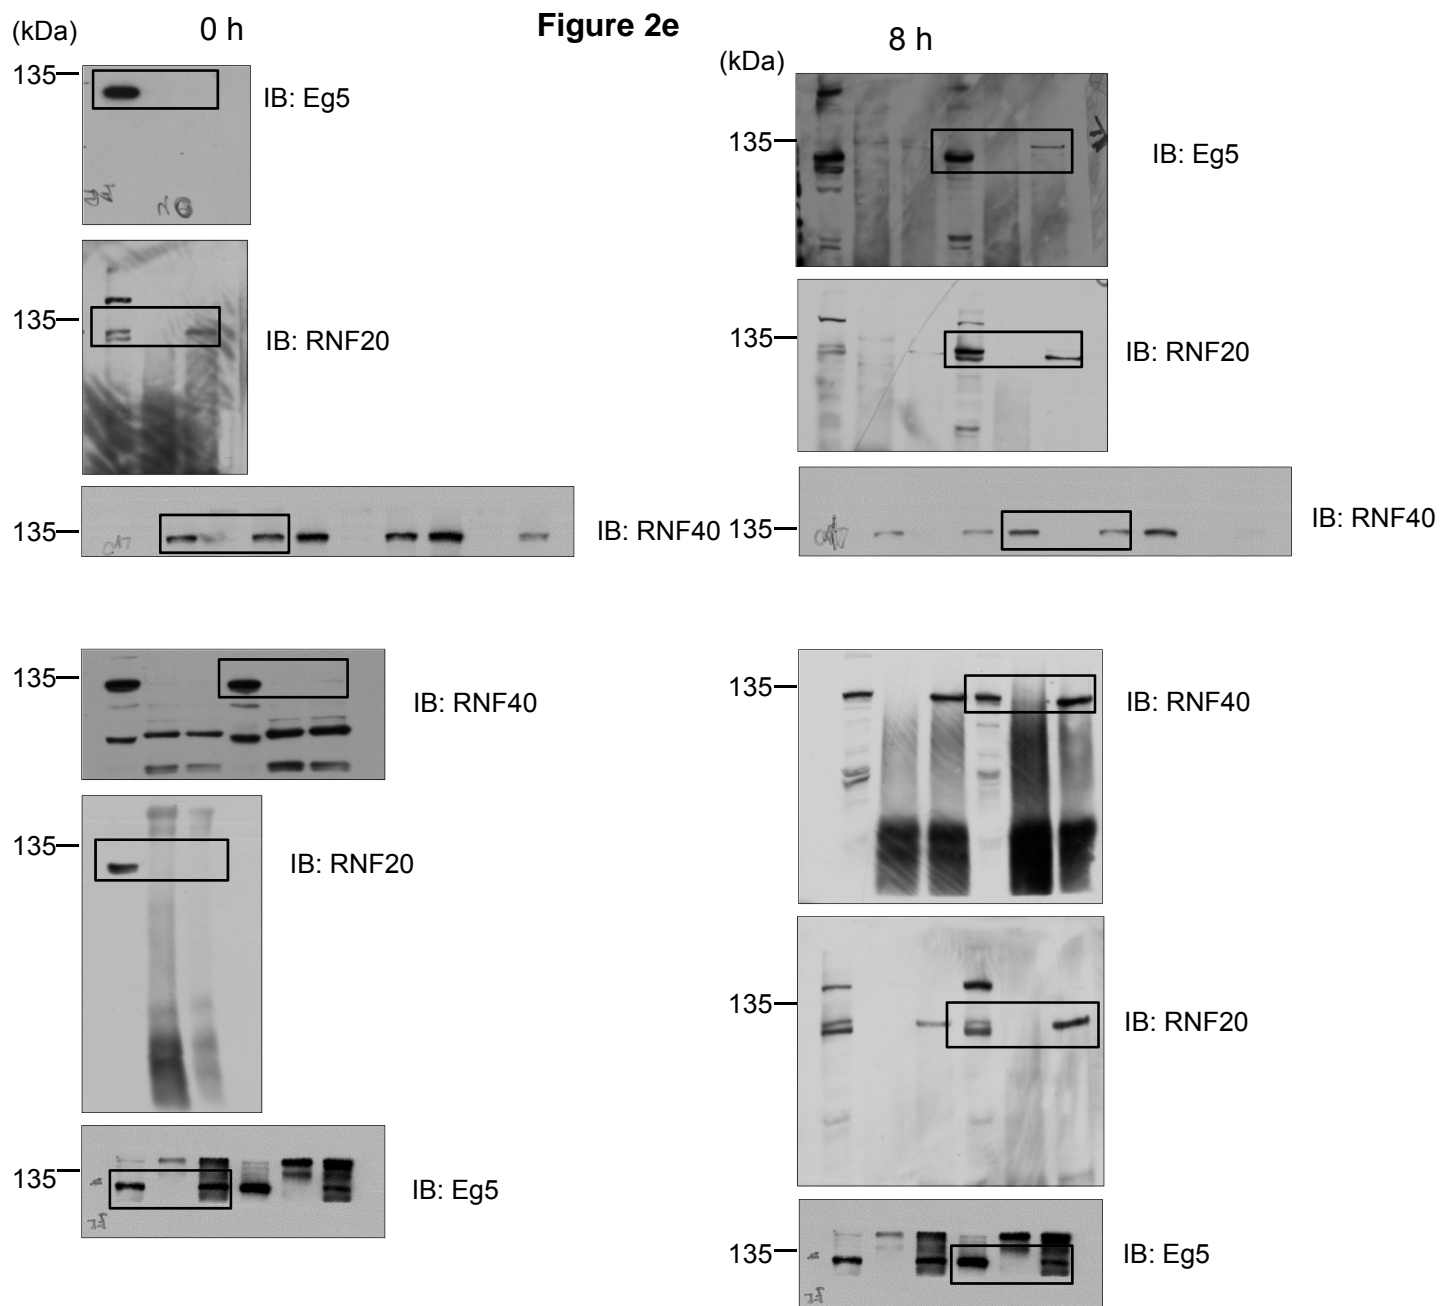

**Supplementary Figure 5. Uncropped scans of blots.** Uncropped scans of Figure 2e.

## Supplementary Figure 6

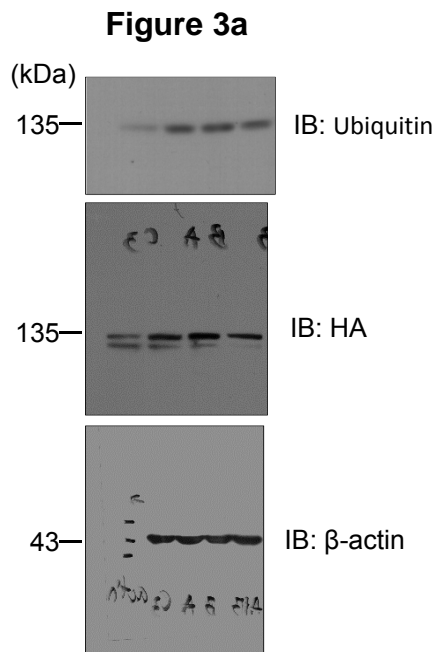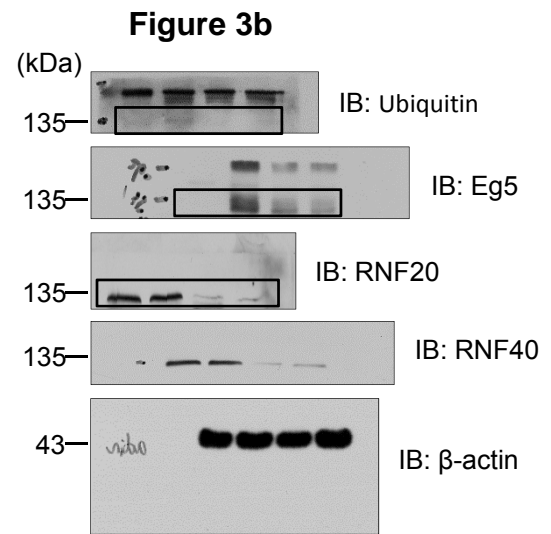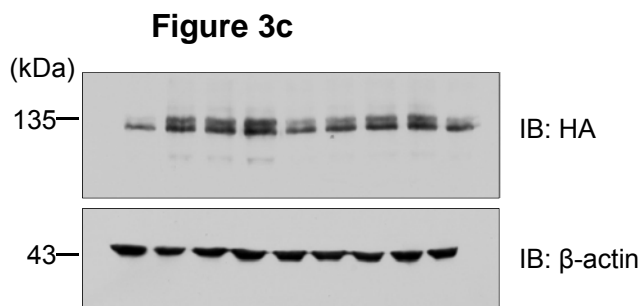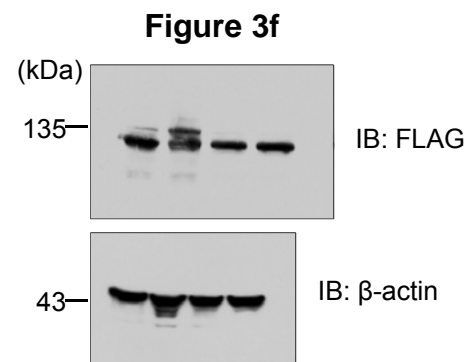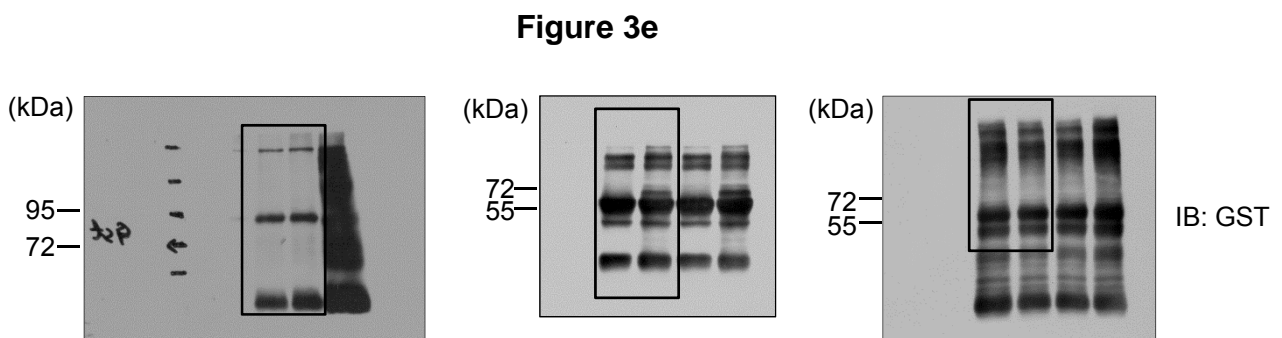

**Supplementary Figure 6. Uncropped scans of blots.** Uncropped scans of Figure 3a, Figure 3b, Figure 3c, Figure 3e, and Figure 3f.

# Supplementary Figure 7

## Figure 4a

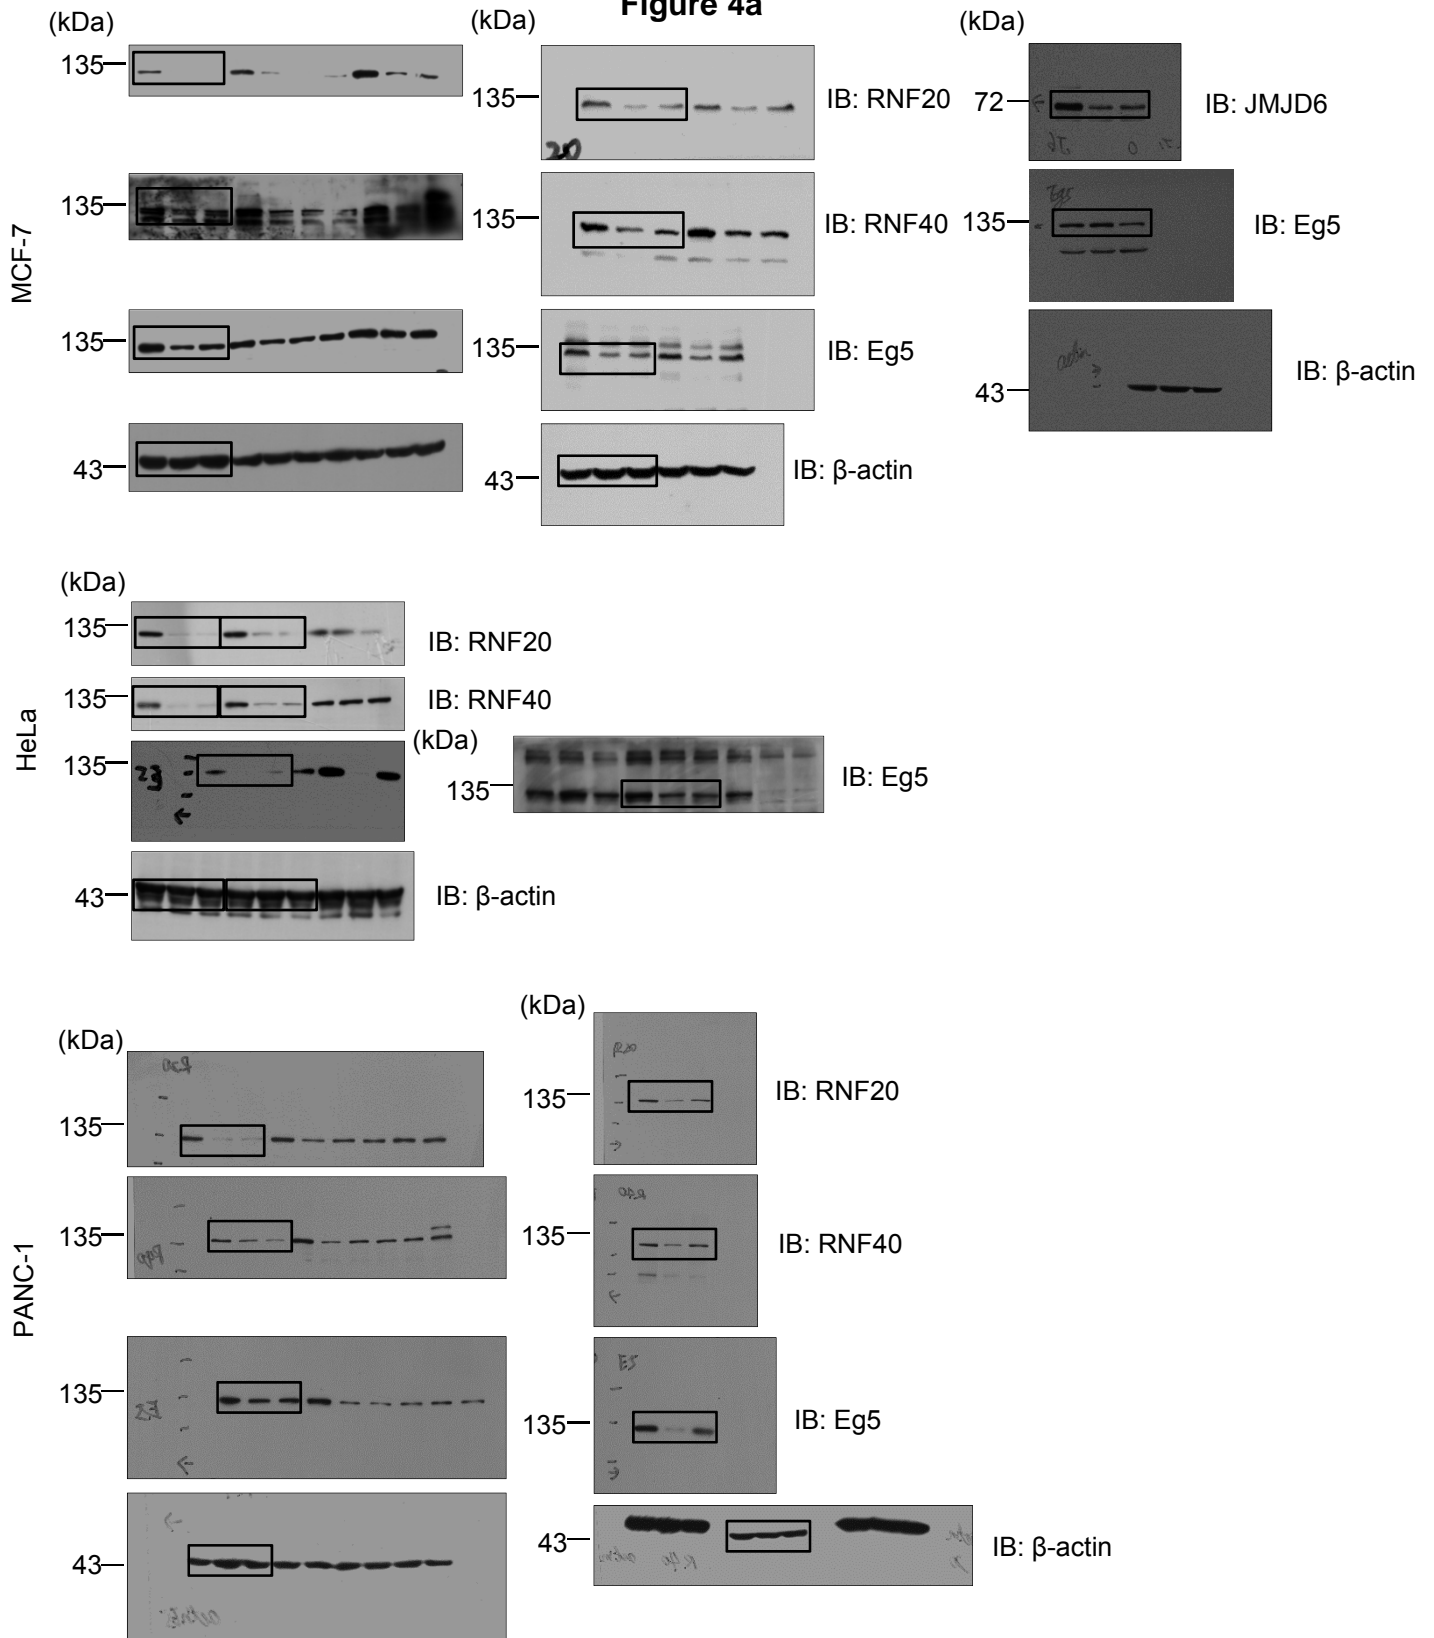

Supplementary Figure 7. Uncropped scans of blots. Uncropped scans of Figure 4a.

## Supplementary Figure 8

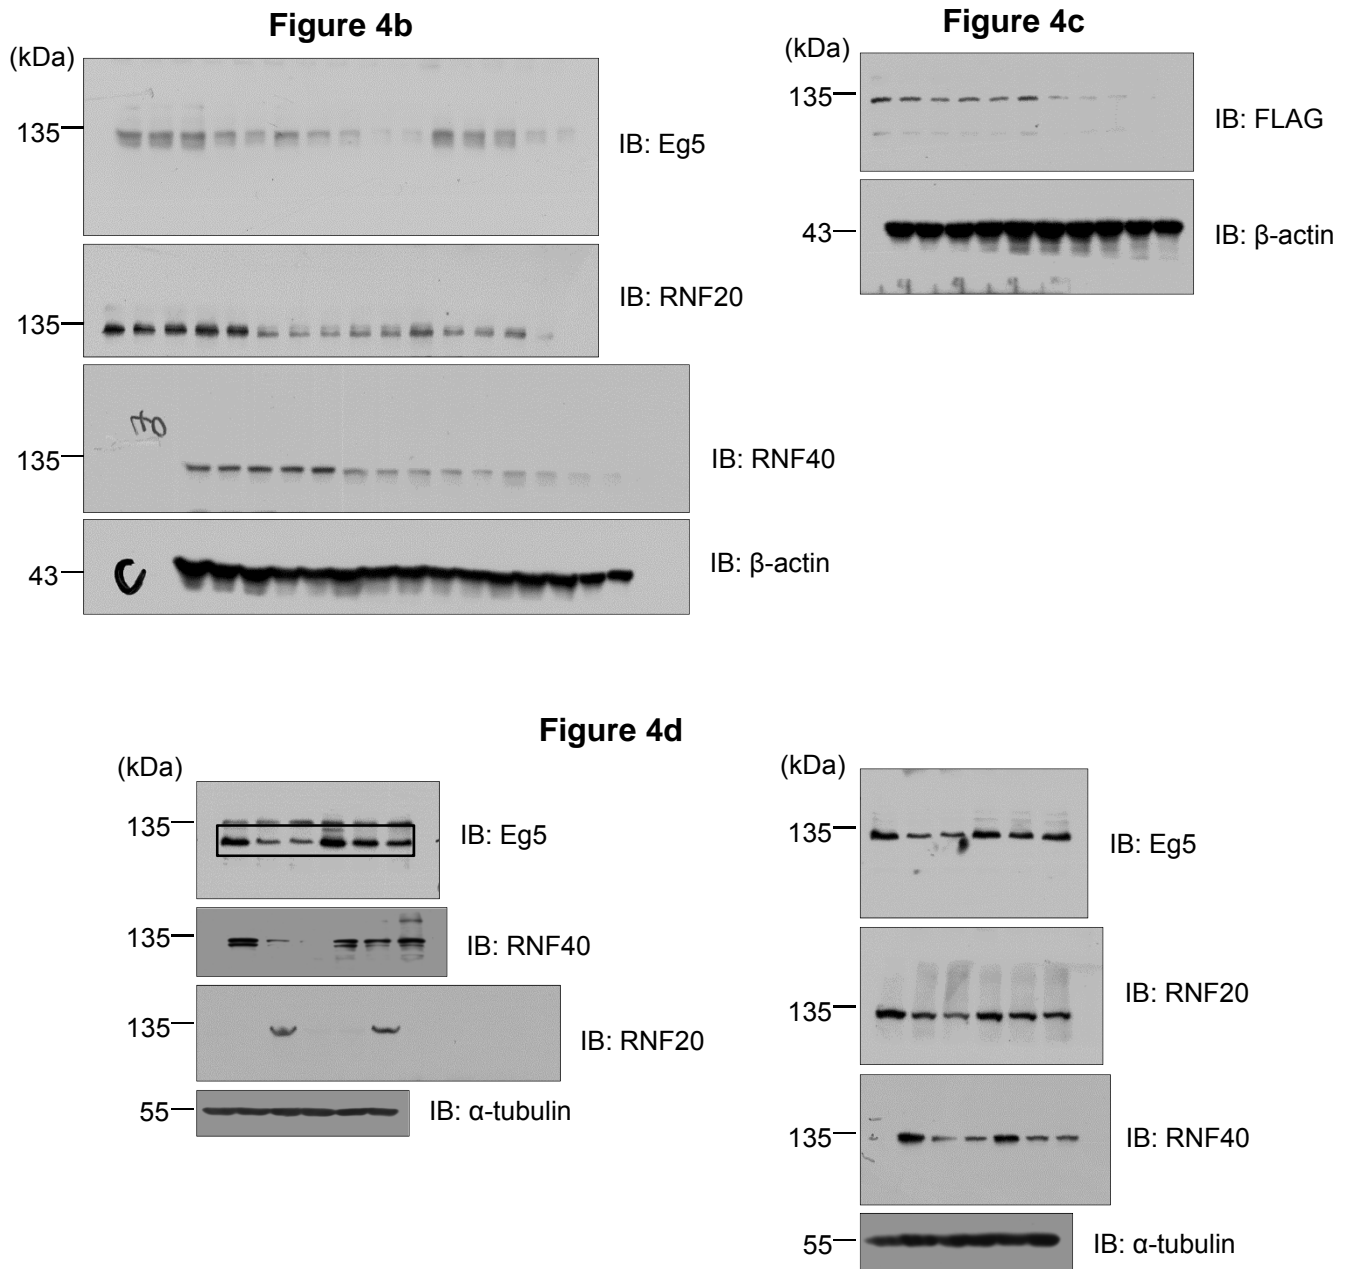

**Supplementary Figure 8. Uncropped scans of blots.** Uncropped scans of Figure 4b, Figure 4c, and Figure 4d.



## Supplementary Figure 9

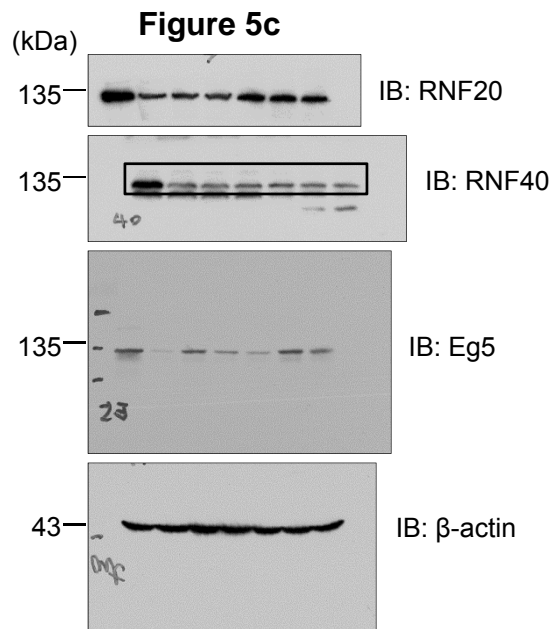

**Supplementary Figure 9. Uncropped scans of blots.** Uncropped scans of Figure 5c.

# Supplementary Figure 10

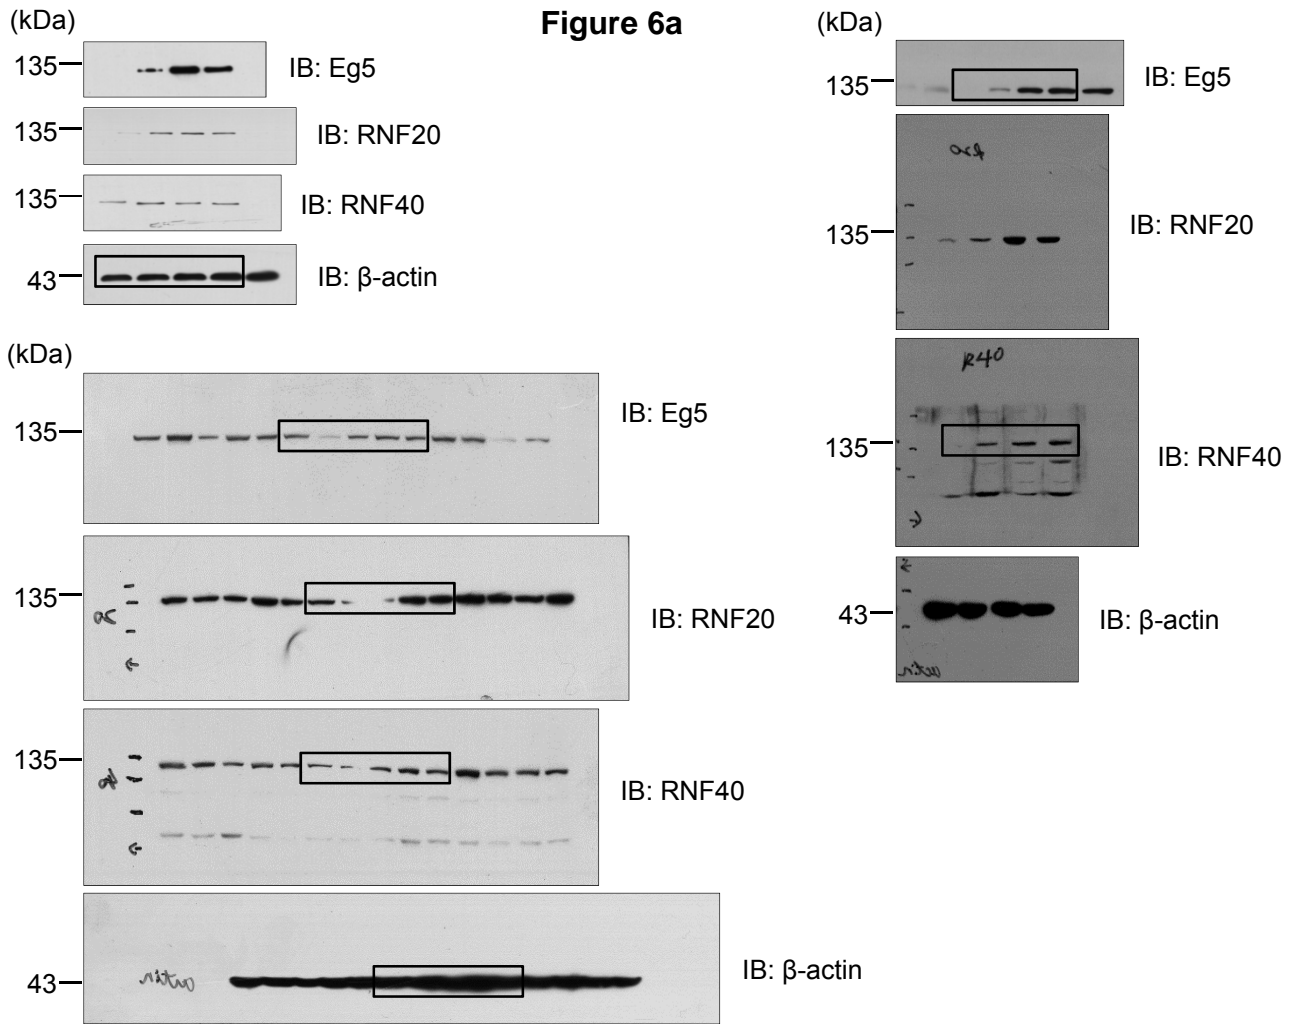

Supplementary Figure 10. Uncropped scans of blots. Uncropped scans of Figure 6a.

## Supplementary Figure 11

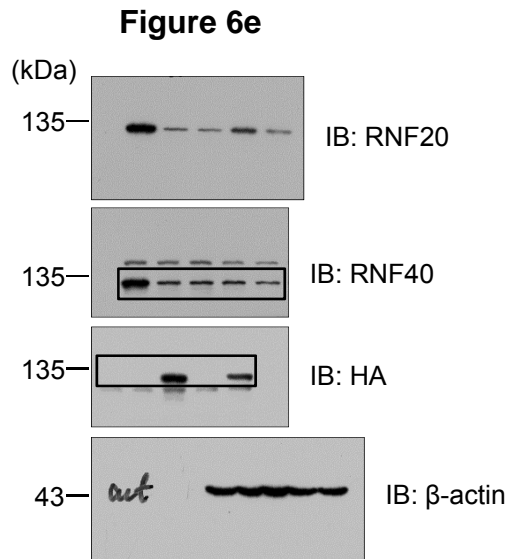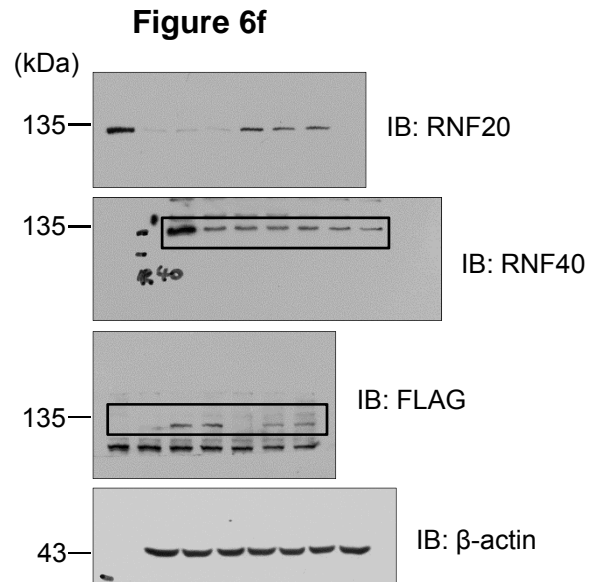

## Supplementary Figure 1

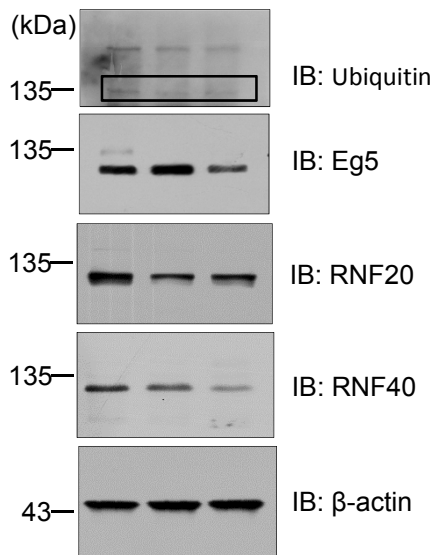

**Supplementary Figure 11. Uncropped scans of blots.** Uncropped scans of Figure 6e, Figure 6f, and Supplementary Figure 1.
